# Supplementary material
Source: Springer Nature journal article supplement (https://www.springermedizin.de/resource/supplementary/13195_2013_195_MOESM1_ESM.pdf/9688454)

# Consort Flow Chart

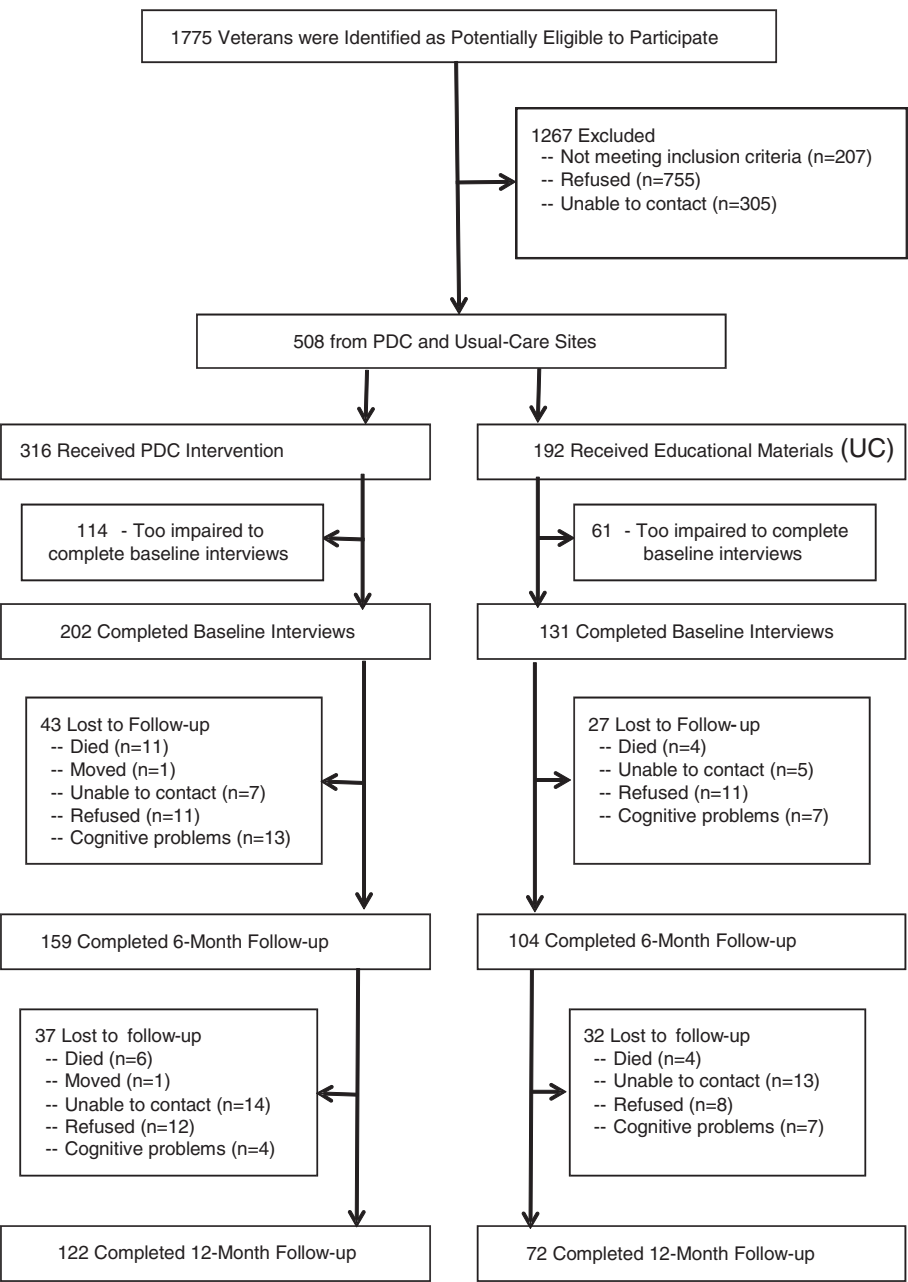

Supplement: MOESM1 [file 9688454]
